# Supplementary material for: A Redox-Switchable Colorimetric Probe for “Naked-Eye” Detection of Hypochlorous Acid and Glutathione
Source: PubMed Central journal article supplement (PMC6651190; doi:10.3390/molecules24132455), 2019-07-04
Supplement: molecules-24-02455-s001.pdf [file molecules-24-02455-s001.pdf]

## Supplementary Materials

### **A redox-switchable colorimetric probe for “naked-eye” detection of hypochlorous acid and glutathione**

Qian Han,<sup>‡1,3</sup> Fang Zhou,<sup>‡1</sup> Yue Wang,<sup>1</sup> Huan Feng,<sup>1</sup> Qingtao Meng,<sup>\*1</sup> Zhiqiang Zhang,<sup>\*1</sup> and Run Zhang,<sup>\*1,2</sup>

<sup>1</sup> School of Chemical Engineering, University of Science and Technology Liaoning, Anshan, Liaoning, 114051, P. R. China.

E-mail: qtmeng@ustl.edu.cn; zhangzhiqiang@ustl.edu.cn. Tel.: +86-412-5929627

<sup>2</sup> Australian Institute for Bioengineering and Nanotechnology, The University of Queensland, Brisbane, 4072, Australia.

Email: r.zhang@uq.edu.au; Tel.: + 61 7 3346 3806, Fax: + 61 7 3346 3978

<sup>3</sup> School of Chemistry and Life Science, Anshan Normal University, Anshan 114007, P. R. China.

<sup>‡</sup> These authors contributed equally to this work and they should be regarded as co-first authors.

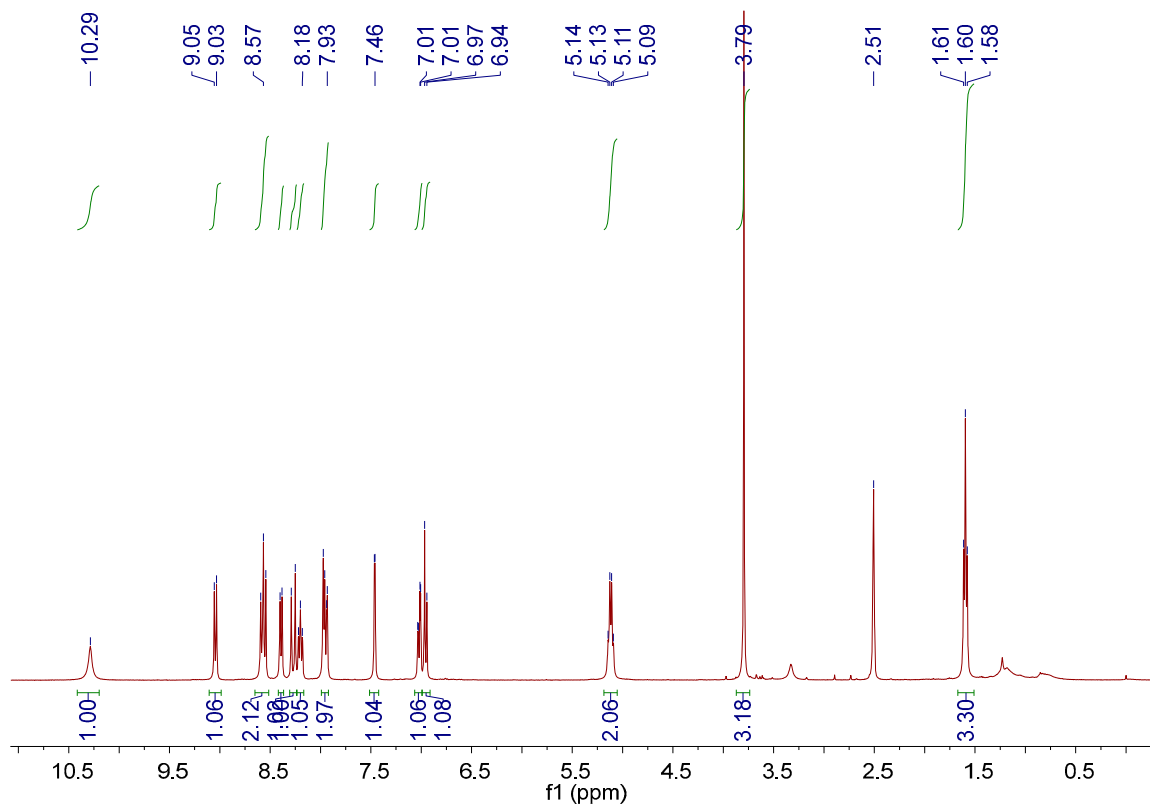

**Figure S1.**  $^1\text{H}$  NMR of L-ol (DMSO- $d_6$ ).

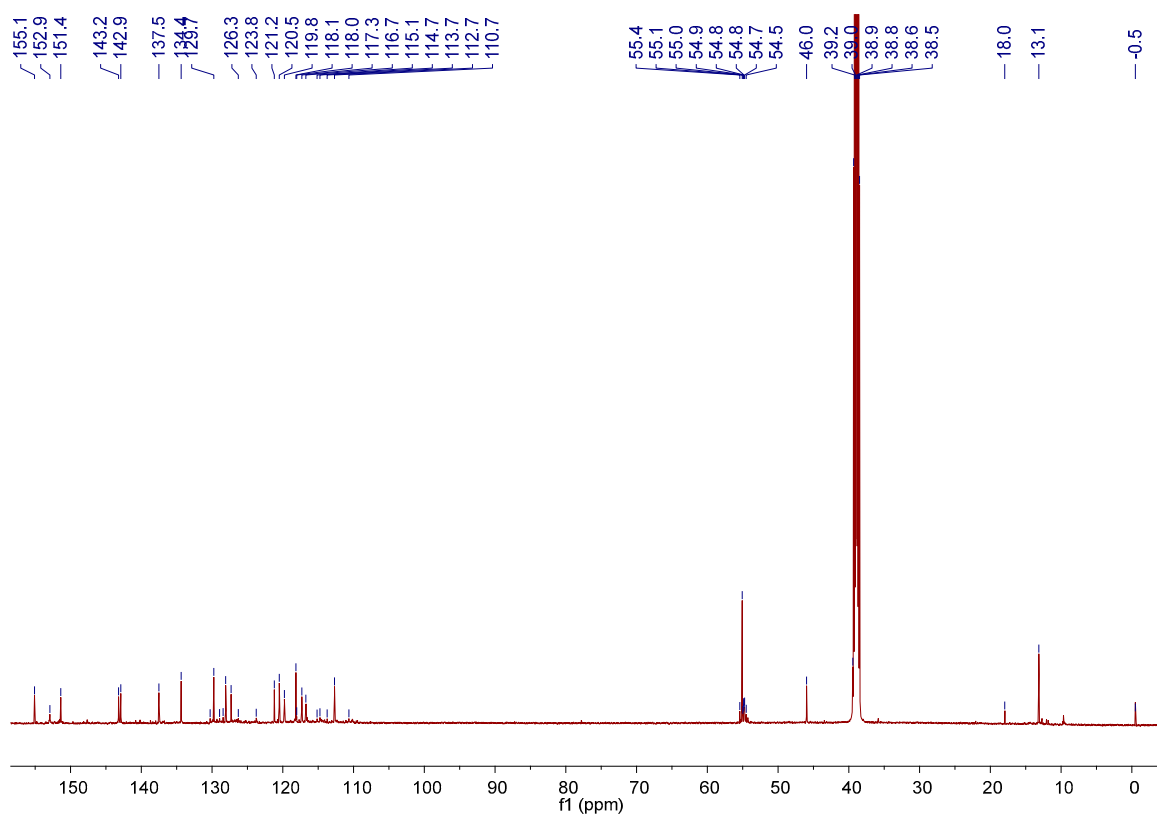

**Figure S2.**  $^{13}\text{C}$  NMR of L-ol (DMSO- $d_6$ ).

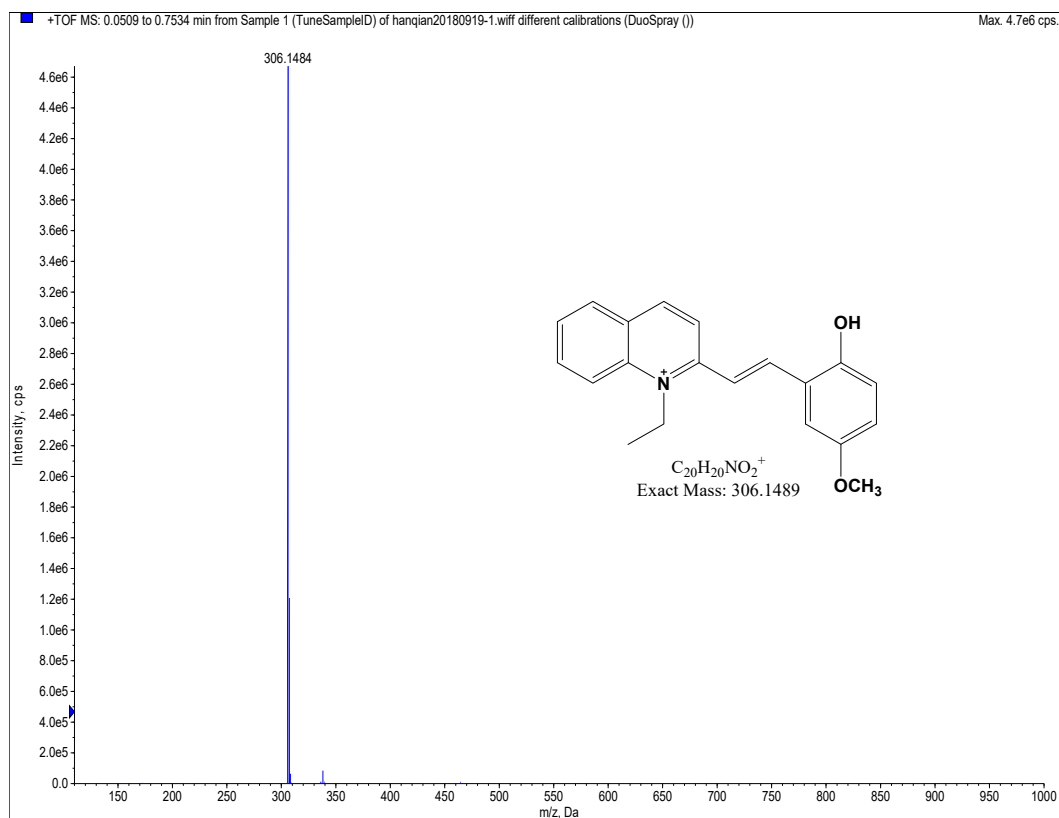

**Figure S3.** HRMS of L-ol.

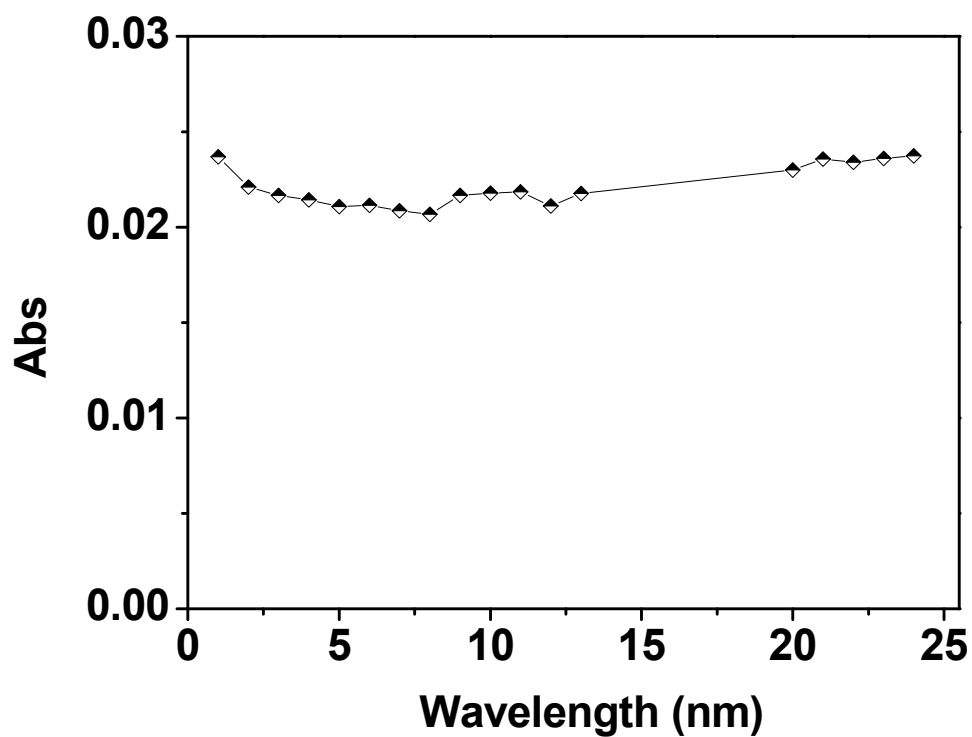

**Figure S4.** Absorbance at 619 nm of L-ol (10  $\mu$ M) at different time in PBS aqueous buffer (DMF: PBS=7:3, 20 mM, pH=7.4).

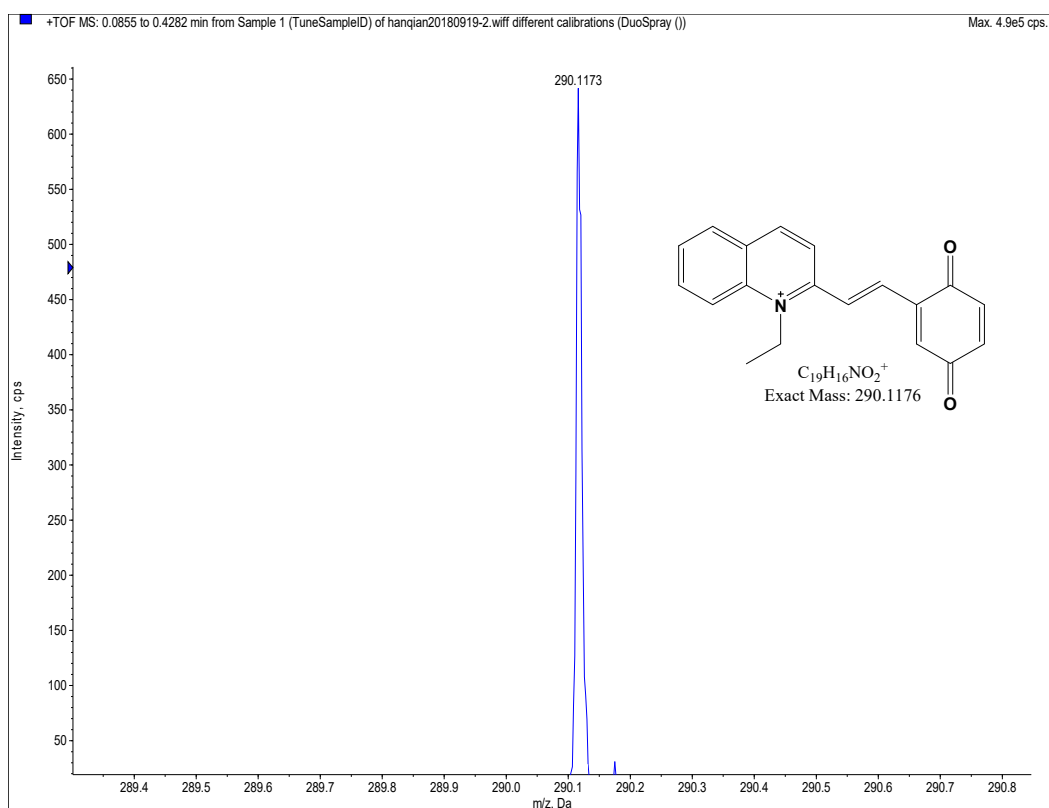

**Figure S5.** HRMS of **L-ol** in the presence of HOCl.

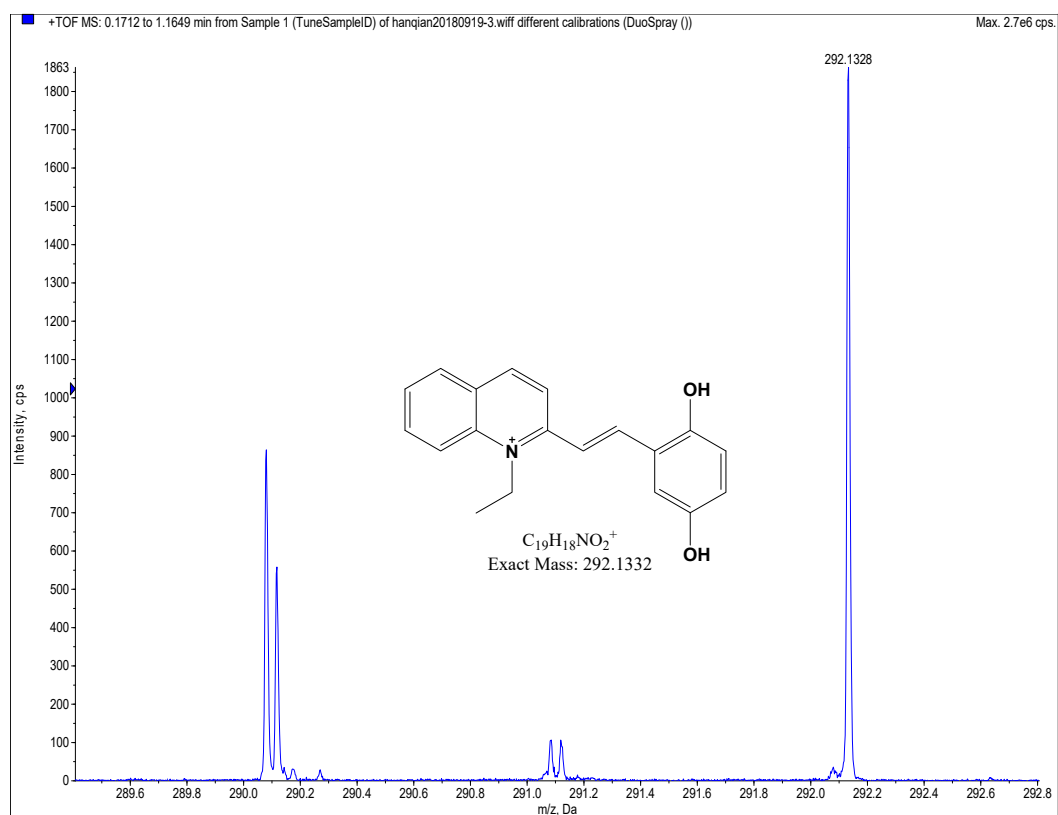

**Figure S6.** HRMS of HOCl pre-treated **L-ol** in the presence of GSH.

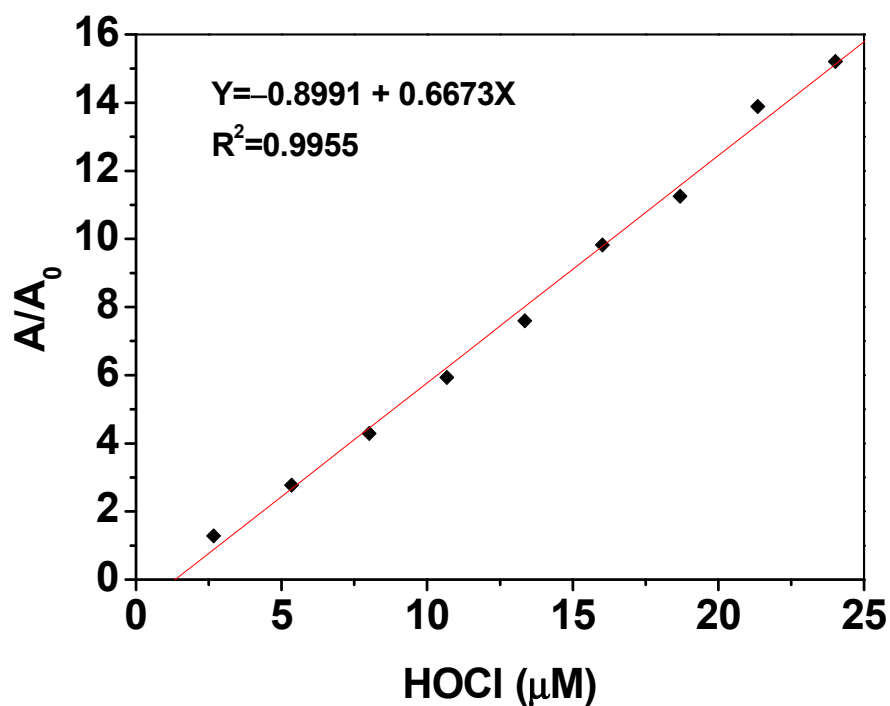

**Figure S7.** UV-vis absorption spectra changes at 619 nm of L-ol (2 μM) as a function of HOCl concentration (2.5–25.0 μM).

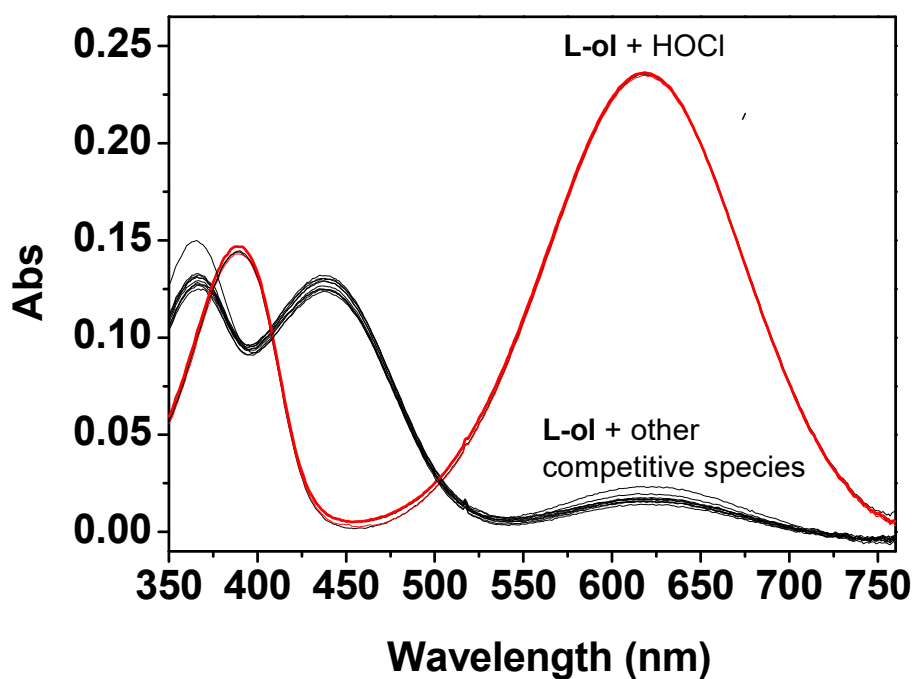

**Figure S8.** Absorption spectra of L-ol (10 μM) in PBS aqueous buffer (DMF: PBS=7:3, 20 mM, pH=7.4) upon addition of various anions (50 μM): Br<sup>-</sup>, AcO<sup>-</sup>, Cl<sup>-</sup>, F<sup>-</sup>, HSO<sub>3</sub><sup>-</sup>, HSO<sub>4</sub><sup>-</sup>, S<sup>2-</sup>, NO<sub>2</sub><sup>-</sup>, NO<sub>3</sub><sup>-</sup>, OH<sup>-</sup>, PO<sub>4</sub><sup>2-</sup>, SO<sub>3</sub><sup>2-</sup>, SO<sub>4</sub><sup>2-</sup>, HCO<sub>3</sub><sup>-</sup>, Pi, PPi, HOCl, <sup>1</sup>O<sub>2</sub>, ONOO<sup>-</sup>, .OH, H<sub>2</sub>O<sub>2</sub>, Cys, Hcy and GSH.

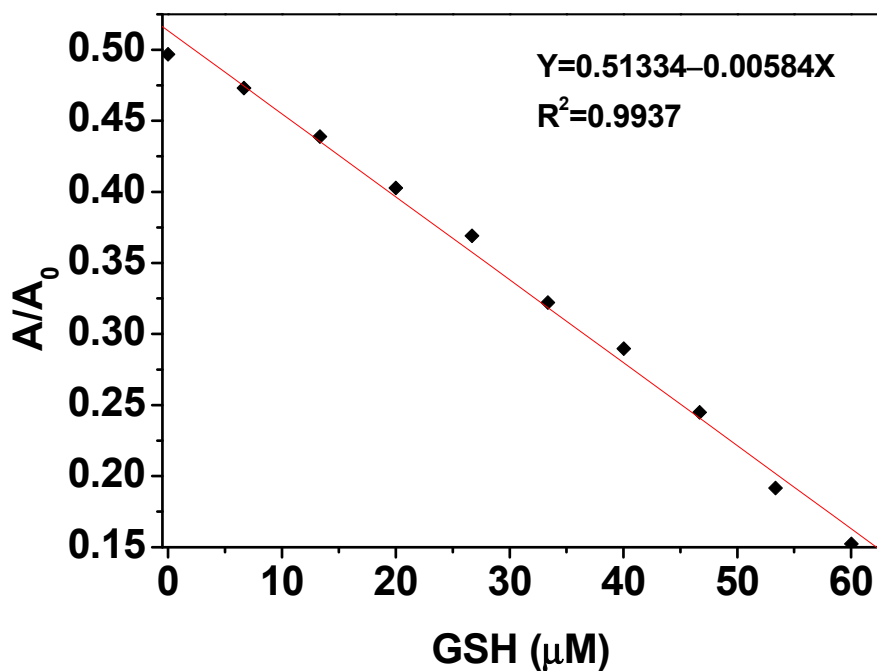

**Figure S9.** UV-vis absorption spectra changes at 617 nm of L-one (2 μM) as function of GSH concentrations (0–6.0 μM).

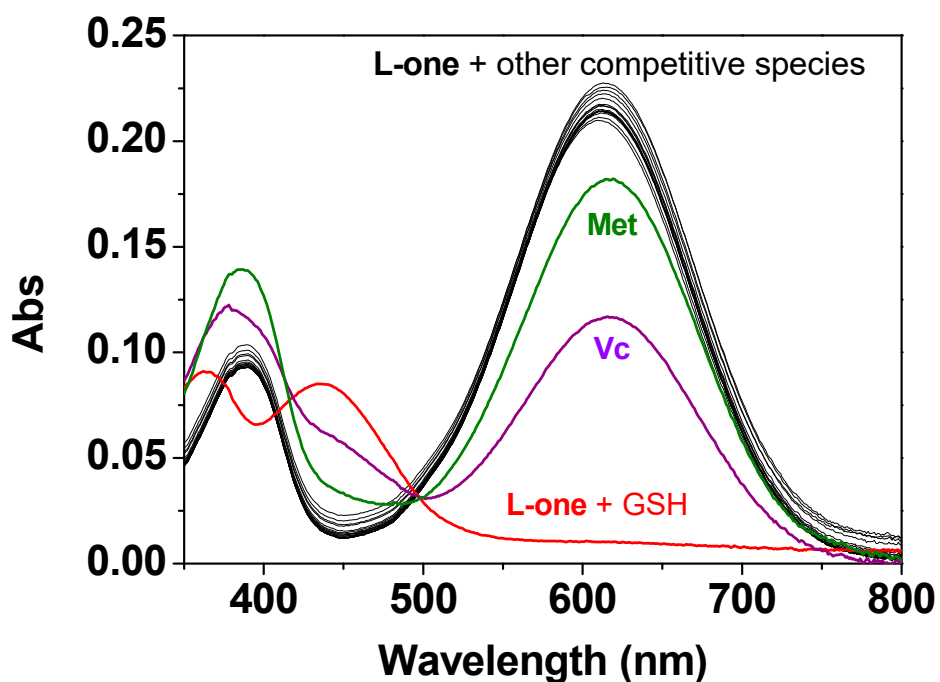

**Figure S10.** UV-vis absorption spectra of L-one (10 μM) in the presence of various analytes (500 μM) in PBS aqueous buffer (DMF:PBS=7:3, 20 mM, pH=7.4): Leu, His, Val, Tyr, Gerl, Try, Phe, Leu, Thr, Lys, Gly, Pro, Ary, Gln, Asn, Asp, Ala, Met, Hcy, Cys, S<sup>2-</sup>, HSO<sub>4</sub><sup>-</sup>, HSO<sub>3</sub><sup>-</sup>, SO<sub>4</sub><sup>2-</sup>, SO<sub>3</sub><sup>2-</sup>, Vc and GSH.

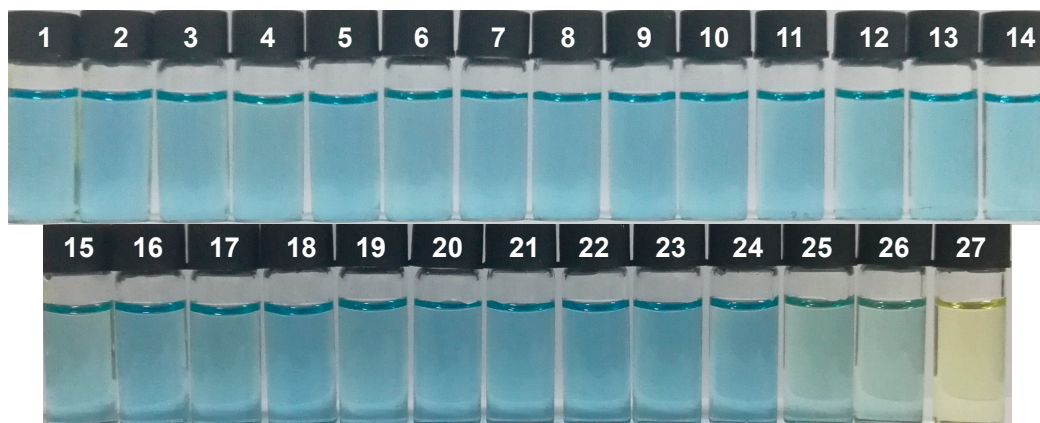

**Figure S11.** The color changes of **L-one** (10  $\mu\text{M}$ ) towards various competitive species (500  $\mu\text{M}$ ) in PBS aqueous buffer (DMF:PBS=7:3, 20 mM, pH=7.4). 1. Leu, 2. His, 3. Val, 4. Tyr, 5. Gerl, 6. Try, 7. Phe, 8. Leu, 9. Thr, 10. Lys, 11. Gly, 12. Pro, 13. Ary, 14. Gln, 15. Asn, 16. Asp, 17. Ala, 18. Hcy, 19. Cys, 20.  $\text{S}^{2-}$ , 21.  $\text{HSO}_4^-$ , 22.  $\text{HSO}_3^-$ , 23.  $\text{SO}_4^{2-}$ , 24.  $\text{SO}_3^{2-}$ , 25. Met, 26. Cv, 27. GSH.
